# Supplementary material
Source: PubMed Central journal article supplement (PMC4815412)
Supplement: PRO-25-676-s001.pdf [file PRO-25-676-s001.pdf]

**This file contains the agreement between binding predictors on a pairwise basis of the per-residue binary scores.**

|           |                         |                         |                        |                         |                      |                      |
|-----------|-------------------------|-------------------------|------------------------|-------------------------|----------------------|----------------------|
|           | anchor_def-disordp_dna  | anchor_def-disordp_rna  | anchor_def-disordp_pro | anchor_def-morfpred     |                      |                      |
| conserved | 0.884029797             | 0.875145349             | 0.928070494            | 0.858666424             |                      |                      |
| contained | 0.877336953             | 0.860750405             | 0.913752195            | 0.869512051             |                      |                      |
| conflict  | 0.950864173             | 0.909501025             | 0.980109364            | 0.953725222             |                      |                      |
| overlap   | 0.875178                | 0.85820669              | 0.90961085             | 0.906319303             |                      |                      |
|           | disordp_dna-disordp_rna | disordp_dna-disordp_pro | disordp_dna-morfpred   | disordp_rna-disordp_pro | disordp_rna-morfpred | disordp_pro-morfpred |
| conserved | 0.871566134             | 0.89037064              | 0.853706395            | 0.883739099             | 0.850744913          | 0.871475291          |
| contained | 0.869837388             | 0.885088935             | 0.877174285            | 0.872967349             | 0.863459672          | 0.884701896          |
| conflict  | 0.895635192             | 0.960189435             | 0.939253979            | 0.917556879             | 0.899257885          | 0.961859193          |
| overlap   | 0.882508112             | 0.89063193              | 0.919088638            | 0.884632444             | 0.910194458          | 0.934892733          |
