# Supplementary material
Source: PubMed Central journal article supplement (PMC4815412)
Supplement: PRO-25-676-s002.pdf [file PRO-25-676-s002.pdf]

**This file contains the agreement between disorder predictors on a pairwise basis of the per-residue binary scores.**

|           | dynamine-esp_xray | esp_xray-iup_short | iup_short-dynamine |
|-----------|-------------------|--------------------|--------------------|
| conserved | 0.840734012       | 0.835773983        | 0.839444041        |
| contained | 0.841516292       | 0.847389175        | 0.835576098        |
| conflict  | 0.88944439        | 0.915477004        | 0.880929597        |
| overlap   | 0.837850456       | 0.849032379        | 0.842729416        |
